# Supplementary material
Source: Springer Nature journal article supplement (https://www.springermedizin.de/resource/supplementary/12913_2013_3035_MOESM6_ESM.pdf/9533284)

**Topic:** What not to do before blood test

**Quote:** *Suggestion from a nurse*

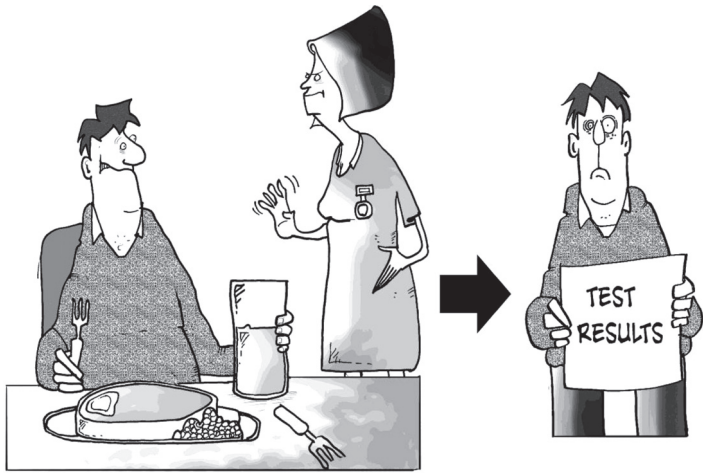

Supplement: MOESM6 [file 9533284]
